## RESEARCH ARTICLE

# Mouse early extra-embryonic lineages activate compensatory endocytosis in response to poor maternal nutrition

Congshan Sun<sup>1</sup>, Miguel A. Velazquez<sup>1</sup>, Stephanie Marfy-Smith<sup>1</sup>, Bhavwanti Sheth<sup>1</sup>, Andy Cox<sup>1</sup>, David A. Johnston<sup>2</sup>, Neil Smyth<sup>1</sup> and Tom P. Fleming<sup>1,\*</sup>

## ABSTRACT

Mammalian extra-embryonic lineages perform the crucial role of nutrient provision during gestation to support embryonic and fetal growth. These lineages derive from outer trophoblast (TE) and internal primitive endoderm (PE) in the blastocyst and subsequently give rise to chorio-allantoic and visceral yolk sac placenta, respectively. We have shown maternal low protein diet exclusively during mouse preimplantation development (Emb-LPD) is sufficient to cause a compensatory increase in fetal and perinatal growth that correlates positively with increased adult-onset cardiovascular, metabolic and behavioural disease. Here, to investigate early mechanisms of compensatory nutrient provision, we assessed the influence of maternal Emb-LPD on endocytosis within extra-embryonic lineages using quantitative imaging and expression of markers and proteins involved. Blastocysts collected from Emb-LPD mothers within standard culture medium displayed enhanced TE endocytosis compared with embryos from control mothers with respect to the number and collective volume per cell of vesicles with endocytosed ligand and fluid and lysosomes, plus protein expression of megalin (Lrp2) LDL-family receptor. Endocytosis was also stimulated using similar criteria in the outer PE-like lineage of embryoid bodies formed from embryonic stem cell lines generated from Emb-LPD blastocysts. Using an *in vitro* model replicating the depleted amino acid (AA) composition found within the Emb-LPD uterine luminal fluid, we show TE endocytosis response is activated through reduced branched-chain AAs (leucine, isoleucine, valine). Moreover, activation appears mediated through RhoA GTPase signalling. Our data indicate early embryos regulate and stabilise endocytosis as a mechanism to compensate for poor maternal nutrient provision.

**KEY WORDS:** Mouse embryo, Trophoblast, Primitive endoderm, Embryoid body, Endocytosis, Maternal diet, RhoA

## INTRODUCTION

Environmental factors around the time of conception including maternal nutrition, health and body condition together with *in vitro* assisted reproduction treatments (ART) have all been shown to influence the course of mammalian development. This has been demonstrated in different animal and human models and leads to

altered physiology and health of offspring (Fleming et al., 2004; Duranton et al., 2008; Fleming et al., 2012; Laguna-Barraza et al., 2013). In the context of maternal nutrition, we have used rat (Kwong et al., 2000) and mouse (Watkins et al., 2008; Watkins et al., 2010; Watkins et al., 2011) models to show that low protein diet fed during the ‘periconceptional’ (PC) period alone (Emb-LPD) before return to control diet for the remainder of gestation and throughout postnatal life is sufficient to change the rate of fetal and postnatal growth and lead to adult-onset cardiovascular, metabolic and behavioural disease. Poor maternal nutrition in large domestic animals during the PC window also results in increased adult disease risk (Gardner et al., 2004; Sinclair et al., 2007; Torrens et al., 2009). Likewise, in animal ART models, embryo culture and PC treatments cause altered growth rates and increased adult hypertension, metabolic dysfunction and behavioural deficits (Ecker et al., 2004; Fernández-Gonzalez et al., 2004; Watkins et al., 2007; Banrezes et al., 2011). Moreover, in human ART, the selection of commercial embryo culture medium has been shown to change birth weight (Dumoulin et al., 2010) and children born have an increased risk of cardiometabolic disease (Ceelen et al., 2008).

These diverse examples of PC environmental sensitivity with long-term consequences indicate that the extensive chromatin epigenetic reprogramming occurring at this time (Cantone and Fisher, 2013) may be affected by *in vivo* and *in vitro* conditions and lead to heritability of an epigenetic profile that can change gene expression pattern across emerging cell lineages and into postnatal life (Young et al., 2001; Fernández-Gonzalez et al., 2007; Morgan et al., 2008; Calle et al., 2012). Additionally, the manner in which early embryos interact with their environment suggests a range of cellular and physiological mechanisms are at work to modulate the inherent developmental programme and confer plasticity to support survival in challenging conditions. For example, we find in our mouse model that maternal Emb-LPD changes the allocation and ratio of cells within blastocyst lineages with a higher proportion within the outer trophoblast (TE; progenitor of chorio-allantoic placenta) and a lower complement within the inner cell mass (ICM; progenitor of fetus and primitive endoderm lineage) (Eckert et al., 2012). This early consequence of poor maternal diet has also been identified by other laboratories using related mouse and large mammal models (Kakar et al., 2005; Mitchell et al., 2009). We also find increased TE proliferation coincides with increased motility and spreading activity of these cells as they outgrow as trophoblasts, probably to increase their invasiveness into the endometrium during implantation (Eckert et al., 2012).

These early changes in TE behaviour in response to poor maternal diet have significance, we believe, for subsequent development into adulthood. The Emb-LPD treatment leads to stimulation in fetal growth, increased birth weight and, in females, to enhanced postnatal growth into adulthood (Watkins et al., 2008). The increase in Emb-LPD fetal growth appears ‘programmed’ by the blastocyst

<sup>1</sup>Centre for Biological Sciences, University of Southampton, Southampton General Hospital, Southampton SO16 6YD, UK. <sup>2</sup>Faculty of Medicine, University of Southampton, Southampton General Hospital, Southampton SO16 6YD, UK.

\*Author for correspondence (tpf@soton.ac.uk)

This is an Open Access article distributed under the terms of the Creative Commons Attribution License (<http://creativecommons.org/licenses/by/3.0/>), which permits unrestricted use, distribution and reproduction in any medium provided that the original work is properly attributed.

stage, as transfer of Emb-LPD blastocysts into control-fed (NPD) recipients results in enhanced fetal growth despite a normal maternal dietary background (Watkins et al., 2008). Maternal dietary protein restriction has also been shown to increase capacity for maternal-fetal nutrient transfer across both the chorio-allantoic (Coan et al., 2011) and yolk sac (Watkins et al., 2008) placentas during later gestation. Lastly, we find Emb-LPD perinatal weight is significantly positively correlated with adult weight and cardiovascular and behavioural disease risk in later life (Watkins et al., 2008).

Collectively, these findings indicate that early embryos can 'sense' the nutrient quality of their immediate environment and activate responses to aid survival and protect fetal growth crucial for competitive fitness but which may have a 'trade-off' of increased disease risk in later life. Our studies with the mouse Emb-LPD model indicate that insulin and branched-chain amino acid (AA) signalling through the mTORC1 pathway within the uterine environment may be the sensing mechanism for TE responsiveness (Eckert et al., 2012).

Here, we explore alternate mechanisms that may contribute to early embryo responsiveness to poor maternal nutrient provision to aid developmental survival but lead to long-term disease risk; we focus on the potential for endocytosis to fulfil this role (Luzio et al., 2009; Lamb et al., 2013). Preimplantation embryos differentiate a polarised endocytic and lysosomal system within the outer TE lineage during cleavage that preferentially internalises fluid from the outer apical membrane domain (Fleming and Pickering, 1985), comprises megalin (Lrp2 – Mouse Genome Informatics) and cubilin LDL-family receptors (Gueth-Hallonet et al., 1994; Moestrup and Verroust, 2001; Assémat et al., 2005) and is sensitive to insulin (Dunglison et al., 1995). Endocytic, histiotrophic nutrition characterises the maternal-fetal nutrient pathway of the visceral yolk sac (VYS) placenta (Beckman et al., 1997; Zohn and Sarkar, 2010), and we have shown that megalin-mediated VYS endocytosis is enhanced in late gestation in response to maternal protein restriction (Watkins et al., 2008). This second extra-embryonic lineage derives from the primitive endoderm (PE) formed in the late blastocyst at the blastocoelic face of the ICM (Rossant and Tam, 2009). Our data indicate stimulated endocytosis is used by both TE and PE extra-embryonic lineages to compensate for poor maternal nutrition, evident in ligand internalisation, receptor expression and lysosome production. We find dietary induction of enhanced TE endocytosis is activated and stabilised through branched-chain amino acid signalling and involves RhoA GTPase and actin remodelling.

## RESULTS

### Maternal Emb-LPD stimulates trophectoderm endocytosis

We first assessed endocytosis and lysosome presence in blastocysts immediately following collection from Emb-LPD and NPD mothers in KSOM medium containing BSA-BODIPY (to detect digested ligand) and Lyso-Tracker (to detect lysosomes) followed by washing, fixation, confocal microscopy and image analysis. Using both single TE cell complete scan (Fig. 1) and whole embryo scan methods (supplementary material Fig. S1), Emb-LPD blastocysts displayed increased numbers and/or collective volume of labelled vesicles per cell (Fig. 1A-C; supplementary material Fig. S1A-C) in the outer TE layer. Labelled vesicles were mainly localised close to the nucleus rather than in peripheral cytoplasm. In Emb-LPD blastocysts, a higher proportion of the total Lyso-Tracker vesicular pool in TE cells was co-labelled with BSA-BODIPY (Fig. 1D), but the distribution of vesicles with respect to distance to the nucleus was not changed by diet (Fig. 1E; supplementary material Fig. S1D).

NPD and Emb-LPD blastocysts were also immunolabelled for localisation of clathrin and megalin followed by confocal microscopy and image analysis. Both clathrin (Fig. 2A) and megalin (Fig. 2C) were concentrated along the apical surface of TE cells and within vesicular structures in the apical cytoplasm. Using standardised settings and the whole embryo scan method, clathrin (Fig. 2B) and megalin (Fig. 2D) intensity of staining was increased in Emb-LPD blastocysts. Moreover, the increased megalin vesicular staining in Emb-LPD TE cells was located more within the central domain of the cells and closer to the nucleus than in NPD TE cells (Fig. 2E). Blastocyst immunoblots confirmed increased megalin protein in Emb-LPD embryos but not increased clathrin (Fig. 3A,B). However, megalin mRNA was not increased in Emb-LPD blastocysts (supplementary material Fig. S2A).

Changes in ICM endocytosis upon Emb-LPD are unknown, as the tight junction seal of the TE layer prevents diffusion of the BSA-BODIPY probe towards the ICM (Fig. 2F).

### Maternal Emb-LPD stimulates primitive endoderm endocytosis

We have previously shown VYS endoderm endocytosis and megalin protein expression at late gestation to be increased by maternal LPD (i.e. low protein diet provided throughout pregnancy) and Emb-LPD (Watkins et al., 2008). To determine whether this change is mediated from the blastocyst stage and evident within the PE lineage, we conducted similar endocytosis assays to those on blastocyst TE. However, to improve accessibility and to evaluate the heritability of changed phenotype over many cell cycles from the time of maternal dietary treatment, we used embryoid bodies (EBs) formed from embryonic stem cell (ESC) lines derived from NPD and Emb-LPD blastocysts. EBs were generated from passage six ESCs in ESC culture medium without leukemia inhibitory factor (Lif) over 5.5 days during which time an outer layer, two to three cells thick, of PE-like cells form, expressing the PE markers *Gata6* and *Dab2*, also detected by western blotting (Fig. 4A) (Koike et al., 2007). Analysis of endocytosis using BSA-BODIPY revealed EBs derived from Emb-LPD blastocysts had increased vesicle number and collective volume per outer PE-like cell when compared with NPD EBs (Fig. 4B-D). Although lysosome number and volume per cell detected by Lyso-Tracker were also higher in Emb-LPD EBs, the increase was not significant (Fig. 4B-D). Immunoblot analysis of Emb-LPD EBs, however, showed increased expression of megalin and *Lamp1* (lysosome marker) but not clathrin compared with NPD EBs (Fig. 3C,D).

Collectively, these data indicate that both TE and PE lineages exhibit a stimulation of endocytosis in response to maternal Emb-LPD that becomes stabilised and maintained beyond the period of diet treatment within a standard culture environment. Next, we assessed the mechanistic basis for enhanced endocytosis using the blastocyst TE model.

### Induction and regulation of blastocyst TE response to maternal diet

To understand the mechanistic basis of enhanced endocytosis, we assessed the effects of altered environmental protein upon endocytosis in the blastocyst TE model. Embryos from chow-fed mothers were cultured from the two-cell stage [embryonic day (E) 1.5] to blastocyst stage (E3.5) in KSOM medium containing either 1 or 4 mg/ml bovine serum albumin (BSA) concentration before evaluating TE endocytosis activity using the fluid marker fluorescein isothiocyanate (FITC)-dextran in the same medium. BSA was chosen because albumin is the major protein found within

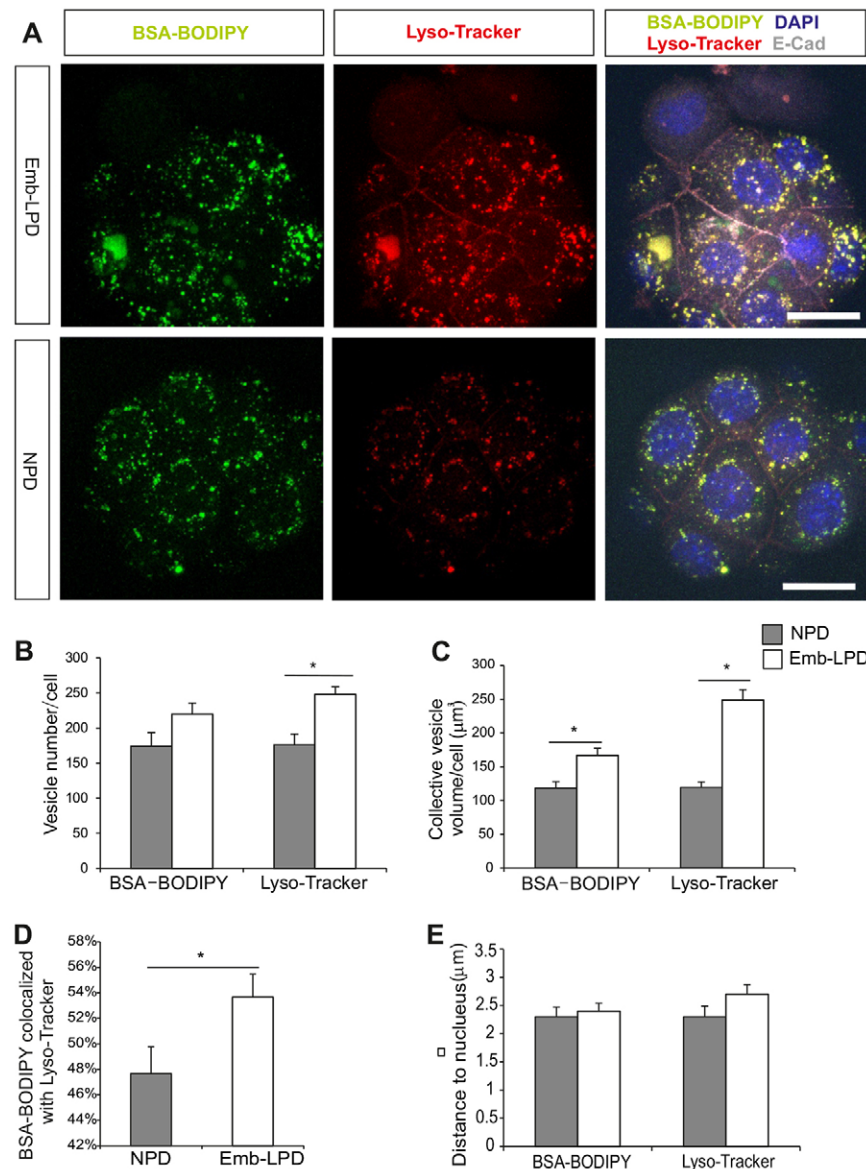

**Fig. 1. Endocytosis is increased in blastocyst TE following maternal Emb-LPD treatment.** (A) Emb-LPD and NPD blastocyst TE surfaces following BSA-BODIPY and Lyso-Tracker endocytosis assay, fixation and E-cadherin (Cdh1 – Mouse Genome Informatics) immunolabelling to identify cell boundaries and confocal microscopy. Vesicular structures containing endocytosed digested ligand (BSA-BODIPY, green) and lysosomes (Lyso-Tracker, red) tend to localise close to TE nuclei (DAPI, blue). (B,C) Emb-LPD blastocysts had increased numbers and collective volume of labelled vesicles within TE cells. (D) Emb-LPD TE cells had an increased proportion of the total Lyso-Tracker pool co-labelled with BSA-BODIPY. (E) Diet treatment had no effect on the distribution of labelled vesicles within TE cells with respect to distance from nucleus. \* $P < 0.05$ ;  $n = 6-7$  mothers and 41-47 blastocysts per treatment. Scale bars: 20  $\mu\text{m}$ .

uterine fluid (Velazquez et al., 2010; Faulkner et al., 2012). We found both the number and collective volume of FITC-dextran labelled vesicles within blastocyst TE to be increased after culture in 1 mg/ml BSA (Fig. 5A-C) using the whole embryo scan method. Our previous work has shown that Emb-LPD blastocysts transferred to NPD recipients are already ‘programmed’ to initiate the compensatory growth response in late gestation induced by the PC maternal protein restriction and do not require continuance of an LPD maternal environment (Watkins et al., 2008). This induced state is also indicated in our analysis of TE and PE-like cell endocytosis in diet-derived samples maintained in culture medium with standard composition (see above). To assess whether the stimulation in endocytosis in medium with reduced protein concentration was similarly stabilised, we compared blastocyst endocytosis when BSA concentration was changed for 1 hour before FITC-dextran culture commenced. Here, blastocysts cultured in 1 mg/ml BSA from the two-cell stage but switched to 4 mg/ml BSA for the terminal 1 hour period retained a high level of endocytosis (Fig. 5B,C). However, blastocysts cultured in 4 mg/ml from the two-cell stage but switched to a terminal 1 mg/ml culture changed their pattern of endocytosis

to a high level (Fig. 5B,C). These data indicate that low environmental protein during preimplantation development can activate compensatory endocytosis in a sustained way, mimicking the effect observed both in our *in vivo* model and after culture of diet-derived embryos.

We next considered the possible signal pathway and specific nutrient sensor that may activate compensatory endocytosis in our model. We have shown that the uterine luminal fluid environment at the time of blastocyst formation in Emb-LPD mothers becomes depleted in branched-chain AAs (BCAAs; leucine, isoleucine and valine) (Eckert et al., 2012). These BCAAs are involved with insulin in the mTORC1 signal transduction pathway regulating cellular growth (Wang and Proud, 2009) and Emb-LPD blastocysts show a reduction in mTORC1 signalling (Eckert et al., 2012). Therefore, we investigated whether this same BCAA signal may also be responsible for the activation of compensatory endocytosis in TE cells.

Embryos from chow-fed mothers were collected at the two-cell stage and cultured until blastocysts in KSOM medium without BSA but with insulin (1 ng/ml) and AAs (including the BCAAs) at a



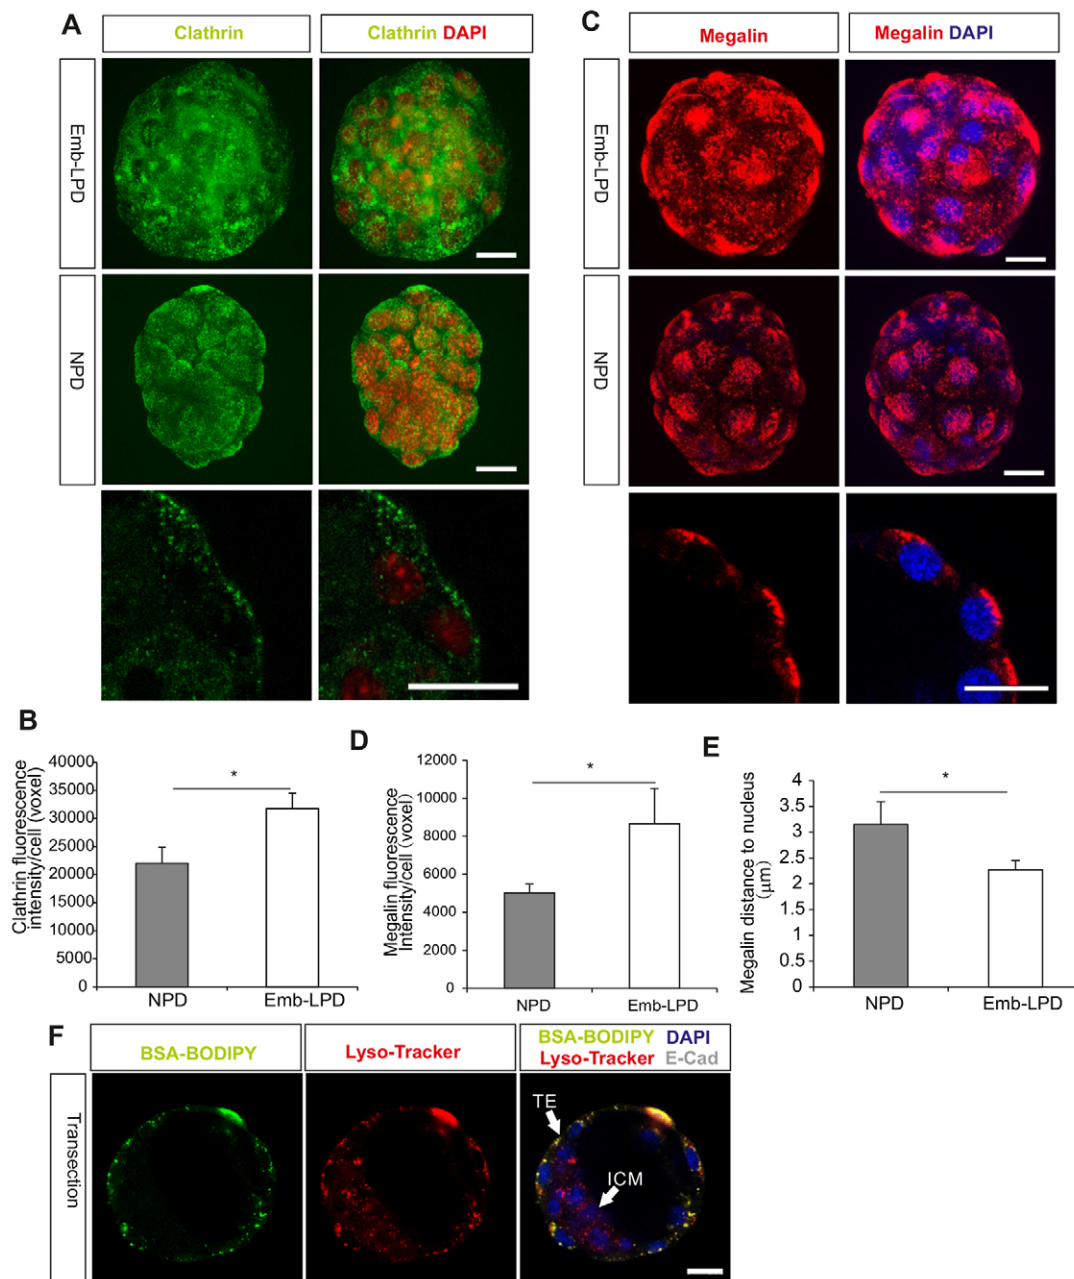

**Fig. 2. Clathrin and megalin immunostaining is increased in Emb-LPD blastocysts; endocytosis using BSA-BODIPY is restricted to TE layer.**

(A) NPD and Emb-LPD blastocysts stained for clathrin (green) and nuclei (DAPI, red). A higher magnification of the NPD TE layer is shown at the bottom. Clathrin is localised to the apical TE surface and cytoplasm. (B) Clathrin staining intensity (voxels) is increased in Emb-LPD blastocysts. (C) NPD and Emb-LPD blastocysts stained for megalin (red) and nuclei (DAPI, blue). A higher magnification of the NPD TE layer is shown at the bottom. Megalin is localised to the apical TE surface and cytoplasm. (D) Megalin staining intensity (voxels) is increased in Emb-LPD blastocysts. (E) Megalin distribution is changed in Emb-LPD TE cells with mean distance to nucleus of vesicular-like staining reduced. \* $P < 0.05$ ; Clathrin:  $n = 5$  mothers and 12 blastocysts per treatment; Megalin:  $n = 7$  mothers and 25 blastocysts per treatment. (F) Endocytosis of BSA-BODIPY (1 hour) is restricted to the TE layer of the blastocyst and does not diffuse into the ICM; shown for NPD blastocyst in single transection. Scale bars: 20  $\mu\text{m}$ .

concentration found in NPD uterine fluid (Eckert et al., 2012). In addition, we cultured embryos in the same medium but with low (50%) or absent (0%) BCAAs. All three groups developed normally to the blastocyst stage, at which time embryos were examined for endocytosis using the FITC-dextran assay using the whole embryo scan method. We found treatment with low BCAAs stimulated endocytosis with both FITC-dextran vesicle number and collective volume per cell increased over the control normal concentration (Fig. 5A,D,E). Embryos cultured in the absence of BCAAs also

exhibited an increase in endocytosis but not to a significant level. Collectively, these data indicate that embryo endocytosis is sensitive to environmental protein concentration and reduced uterine fluid BCAA levels, as found in maternal Emb-LPD mothers. The latter may act specifically to induce increased blastocyst TE endocytosis, but this mechanism functions within the physiological range rather than in complete absence of BCAAs.

We next evaluated the response mechanism within blastocyst TE following collection from diet-fed mothers. As blastocysts exhibit

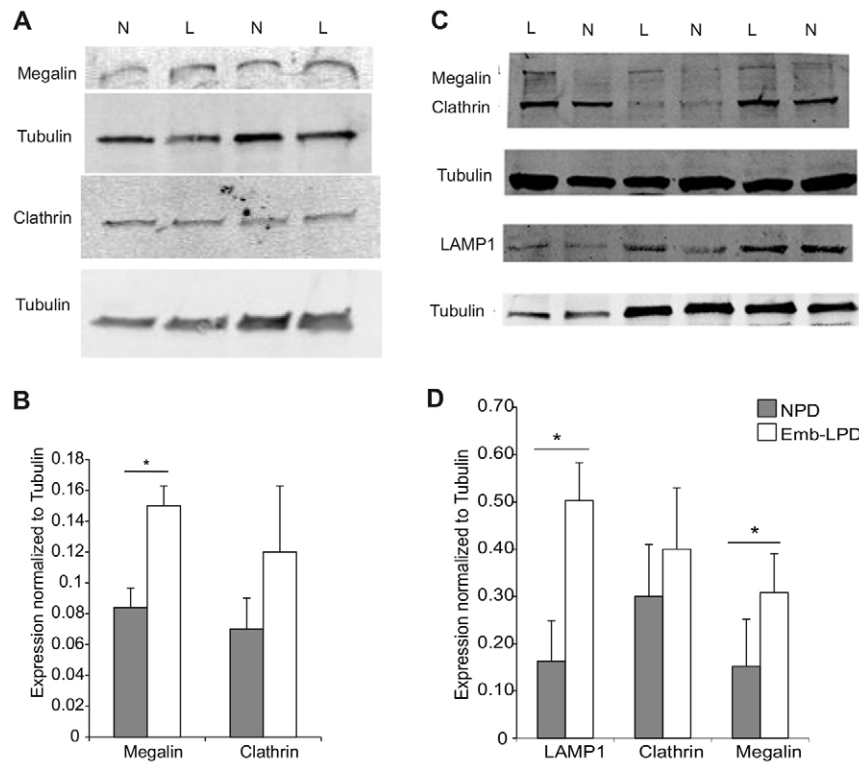

**Fig. 3. Megalin but not clathrin expression is increased in Emb-LPD blastocysts and embryoid bodies (EBs).** (A) Immunoblots of clathrin, megalin and control  $\alpha$ -tubulin in NPD (N) and Emb-LPD (L) blastocysts. (B) Megalin but not clathrin expression is increased in Emb-LPD blastocysts. (C) Immunoblots of clathrin, megalin, Lamp1 (lysosome marker) and control  $\alpha$ -tubulin in NPD (N) and Emb-LPD (L) EBs. (D) Lamp1 and megalin but not clathrin expression is increased in Emb-LPD EBs. \* $P < 0.05$ ; 50 blastocysts per sample, three repeats per treatment; six embryonic stem cell clones for EB formation per treatment.

reduced mTORC1 signalling in response to Emb-LPD (Eckert et al., 2012) and reduced mTORC1 activity is known to positively regulate autophagy and catabolism within cells to supplement nutrient availability (Martina et al., 2012; Jewell et al., 2013), we assessed whether the increased nutrient supply provided by endocytosis was also supplemented by increased autophagy (Lamb et al., 2013). We examined diet blastocysts by immunolabelling for LC3 protein, a marker for cellular autophagy (Florey and Overholtzer, 2012). LC3 was present as cytoplasmic puncta within both TE and ICM cells (supplementary material Fig. S3A). Comparison between NPD and Emb-LPD blastocysts showed no difference in LC3 puncta number or intensity (supplementary material Fig. S3B,C), indicating that embryo autophagy was not responsive to diet treatment.

Endocytosis and vesicular transport is known to be regulated from external signals via Rho-GTPases and downstream effector Rho-associated kinase (Rock) modulation of the actin cytoskeleton (Foerg et al., 2007; Nelson, 2009; Chi et al., 2013). We examined the localisation of RhoA and actin in NPD and Emb-LPD blastocysts following FITC-dextran incubation to quantify endocytosis. We found FITC-dextran endocytosis was increased to trend level ( $P < 0.1$ ) in Emb-LPD blastocysts (collective volume per TE cell; Fig. 6A,B). RhoA localised at the apical surface of TE cells commonly as a ring of punctate staining around the apicobasal column of endocytic vesicles within the central domain of the cells; this was more pronounced in Emb-LPD than NPD blastocysts (Fig. 6A). Actin was predominant in the cytoskeletal regions associated with the cell membrane (Fig. 6A). Quantification of RhoA fluorescence intensity revealed increased levels in Emb-LPD than NPD blastocysts (Fig. 6C) and also to trend level ( $P < 0.1$ ) for actin fluorescence (Fig. 6C).

These data implicate a role for RhoA in stimulation of endocytosis in Emb-LPD blastocysts. To evaluate this directly, we assessed FITC-dextran endocytosis in the presence or absence of the Rho GTPase family inhibitor, C3 transferase (Krijnen et al., 2010) together with

immunolabelling for RhoA and actin (Fig. 6A, right column). Here, FITC-dextran endocytosis was again enhanced in Emb-LPD versus NPD blastocysts in the absence of C3 transferase (Fig. 6D) but in the presence of C3 transferase, RhoA staining was diminished and FITC-dextran endocytosis was reduced and to equivalent levels in both NPD and Emb-LPD blastocysts (Fig. 6D). C3 transferase incubation reduced FITC-dextran endocytosis by ~40% in NPD blastocysts and by ~70% in Emb-LPD blastocysts (Fig. 6D). These data implicate roles for RhoA both in blastocyst endocytosis and upregulation of endocytosis following Emb-LPD treatment.

## DISCUSSION

Our study investigated whether cellular endocytosis was utilised by early extra-embryonic lineages as a compensatory mechanism to supplement nutrient uptake in response to poor maternal nutrition during the preimplantation period. We found both blastocyst TE and EB PE-like lineages activate enhanced endocytosis in response to maternal Emb-LPD with increased uptake of endocytosed fluid and ligand and increased numbers of lysosomes. These responses are accompanied by an increase in expression of the major LDL-receptor family member, megalin (Moestrup and Verroust, 2001; Marzolo and Farfán, 2011) in both extra-embryonic lineages. Moreover, diet-induced enhanced endocytosis is maintained upon *in vitro* culture in medium with standard composition; this stability is most striking in our EB model of PE-like cells, maintained over many passages from original derivation of ESCs from Emb-LPD blastocysts. Our studies also implicate a role for protein concentration generally and reduced BCAA concentration specifically in activation of enhanced TE endocytosis, mimicking the altered uterine fluid environment induced by maternal Emb-LPD treatment. Lastly, we show a role for RhoA signalling in regulating the diet-induced change in endocytosis rate.

The effect of poor maternal diet on stimulation of extra-embryonic lineage endocytosis provides a coherent mechanism for

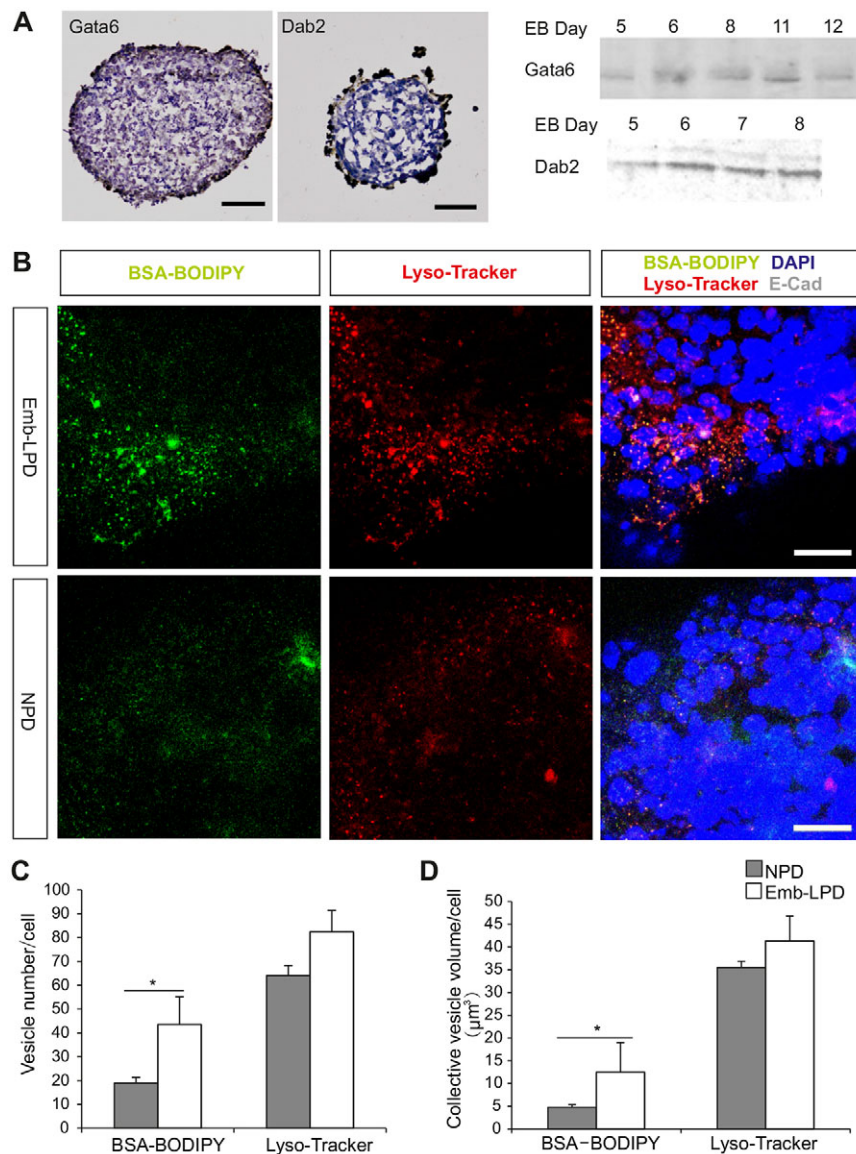

**Fig. 4. Endocytosis is increased in EBs derived from Emb-LPD blastocysts.** (A) Left: 5.5 day EB sections showing Gata6 and Dab2 immunolabelling in the outer PE-like layer of cells. Right: Immunoblots of EBs over 5-12 days showing expression of Gata6 and Dab2. (B) Outer PE-like layer of EBs derived from Emb-LPD and NPD blastocysts following BSA-BODIPY and Lyso-Tracker endocytosis assay, fixation and confocal microscopy. Vesicular structures containing endocytosed digested ligand (BSA-BODIPY, green) and lysosomes (Lyso-Tracker, red) are shown (nuclei, DAPI, blue). (C) BSA-BODIPY but not Lyso-Tracker vesicle number is increased in Emb-LPD EBs. (D) BSA-BODIPY but not Lyso-Tracker collective vesicle volume is increased in Emb-LPD EBs. \* $P < 0.05$ ;  $n = 6$  mothers and ESC clones for EB formation and 26-33 EBs analysed per treatment. Scale bars: 200  $\mu\text{m}$  in A; 20  $\mu\text{m}$  in B.

compensatory nutrient provision to support conceptus survival in challenging conditions. Histiotrophic nutrition, whereby exogenous macromolecules are internalised and degraded and the products made available for conceptus biosynthesis is a characteristic function of the rodent VYS, particularly during organogenesis and before the chorio-allantoic placenta becomes fully active, thereby regulating fetal growth (Bloomfield et al., 2013). Similarly, yolk sac-mediated histiotrophic nutrition is crucial during the first trimester of human development (Burton et al., 2002). Our earlier findings that maternal LPD stimulates VYS endocytosis in late gestation (Watkins et al., 2008) is now extended to show evidence of induction and propagation of this mechanism within the progenitor PE lineage from the PC period. As the TE layer completely encloses the ICM, and we show our endocytosis probe (BSA-BODIPY) does not have access to the ICM (Fig. 2F), we anticipate that the TE performs a similar histiotrophic role to the PE in provision of lysosome-digested nutrients acquired by endocytosis to support the development of the ICM.

Both TE and PE epithelial lineages engage in polarised endocytosis, previously characterised for maturation steps during differentiation (Fleming and Pickering, 1985), actin cytoskeletal

regulation (Fleming et al., 1986), and receptor-mediated uptake via megalin and cubilin (Gueth-Hallonet et al., 1994; Assémat et al., 2005). The complexity of different endocytic pathways regulating cellular internalisation of varied constituents including fluid, nutrients, ligands and pathogens is increasingly recognised. Clathrin-mediated endocytosis is primarily but not exclusively actin-independent, whereas clathrin-independent macro- and micropinocytosis, including apical epithelial surface internalisation of fluid, ligands and macromolecules, is more clearly actin dependent and can be regulated through small GTPases including RhoA (Garred et al., 2001; Sandvig et al., 2008; Bohdanowicz and Grinstein, 2013). Our data indicate that maternal Emb-LPD stimulates TE and PE fluid and ligand endocytosis, increases expression of megalin but not clathrin, and is dependent upon active RhoA coinciding with an increased presence of actin. Collectively, this suggests that clathrin-independent endocytosis is the primary mechanism involved. RhoA GTPase is activated in the GTP-bound state mediated by external stimuli and regulates the downstream effector Rho kinase 1 (Rock1) to modulate actin polymerisation, organisation and myosin contraction and thereby membrane transport and endocytosis (Hall, 2005). The increase in TE apical



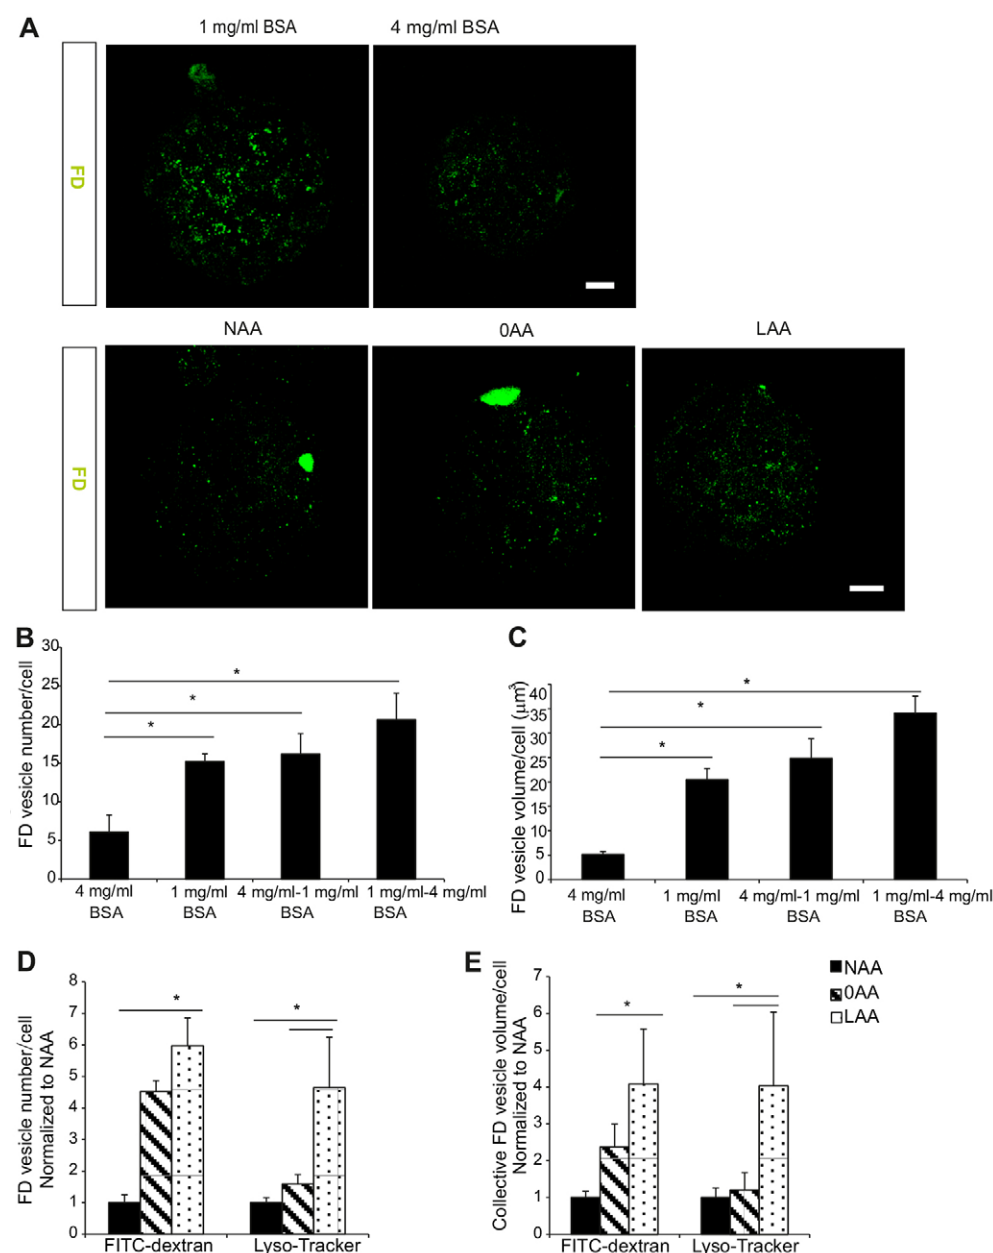

**Fig. 5. Blastocysts cultured *in vitro* from the two-cell stage exhibit enhanced endocytosis in medium with low protein or reduced branched-chain AA (BCAA) composition.** (A) Blastocysts after FITC-dextran (FD) endocytosis assay following culture in different BSA concentrations (top row) or in different BCAA concentrations (bottom row), either at the level found in NPD uterine fluid (NAA), at 50% this concentration (LAA) or in the absence of BCAAs (OAA). (B,C) FD vesicle number and collective volume per cell following culture in different BSA concentrations. Low (1 mg/ml) concentration stimulates endocytosis compared with high (4 mg/ml) concentration; low concentration only for 1 hour at the end of culture is sufficient to stimulate endocytosis (4 mg/ml – 1 mg/ml), whereas a stimulated endocytosis state is stable if blastocysts are switched to high concentration for 1 hour (1 mg/ml – 4 mg/ml). (D,E) Blastocysts cultured from the two-cell stage in NAA, LAA or OAA BCAA concentrations (see text and A above) followed by endocytosis assay either using FITC-dextran or Lyso-Tracker. Endocytosis is stimulated (vesicle number; collective volume per cell) in LAA but not OAA composition. \* $P < 0.05$ ;  $n = 16$ –18 embryos per treatment in three experiments. Scale bar: 20  $\mu\text{m}$ .

surface RhoA coincident with increased actin staining in Emb-LPD blastocysts implicates nutrient sensing to stimulate endocytosis by this pathway. The exoenzyme C3 transferase derived from *Clostridium botulinum* is a potent inhibitor of RhoA, B and C proteins by ADP-ribosylation in the effector-binding domain (Benink and Bement, 2005; Krijnen et al., 2010). C3 transferase treatment preferentially inhibited FITC-dextran endocytosis by Emb-LPD TE cells by ~70% and to a lesser extent in NPD TE cells by ~40% resulting in an equivalent level of reduced internalisation across treatment groups. This indicates that RhoA-mediated endocytosis is specifically enhanced in response to Emb-LPD but that other regulators of endocytosis exist. Endocytosis in blastocysts is known to be insulin sensitive (Dunglison et al., 1995), but because Emb-LPD reduces maternal insulin level (Eckert et al., 2012) it is unlikely to be a contributory factor. The stimulation in megalin expression by Emb-LPD in both TE- and PE-like cells indicates that receptor-mediated endocytosis is enhanced either through actin-mediated or independent mechanisms. Moreover, clathrin

immunostaining was increased although expression is unchanged in response to Emb-LPD, indicating a possible minor involvement in the upregulation of endocytosis, probably mediated through a combination of several pathways.

The upstream inductive mechanism leading to stimulated endocytosis in blastocyst TE by Emb-LPD probably derives from nutrient levels within the immediate maternal tract environment or through indirect changes in factors regulating cellular behaviour mediated through the diet. We show that reduction in protein (BSA) concentration *in vitro* is sufficient to activate an increase in endocytosis as has been reported previously (Dunglison and Kaye, 1995). Interestingly, activation of endocytosis by reduced protein concentration is induced rapidly yet is sustained upon increase of *in vitro* protein level. These characteristics imply a compensatory process designed for longer-term protection in response to nutrient restriction even if conditions are fluctuating and further identify the PC period as key in setting the future growth trajectory. We do not know whether protein concentration is reduced within the maternal

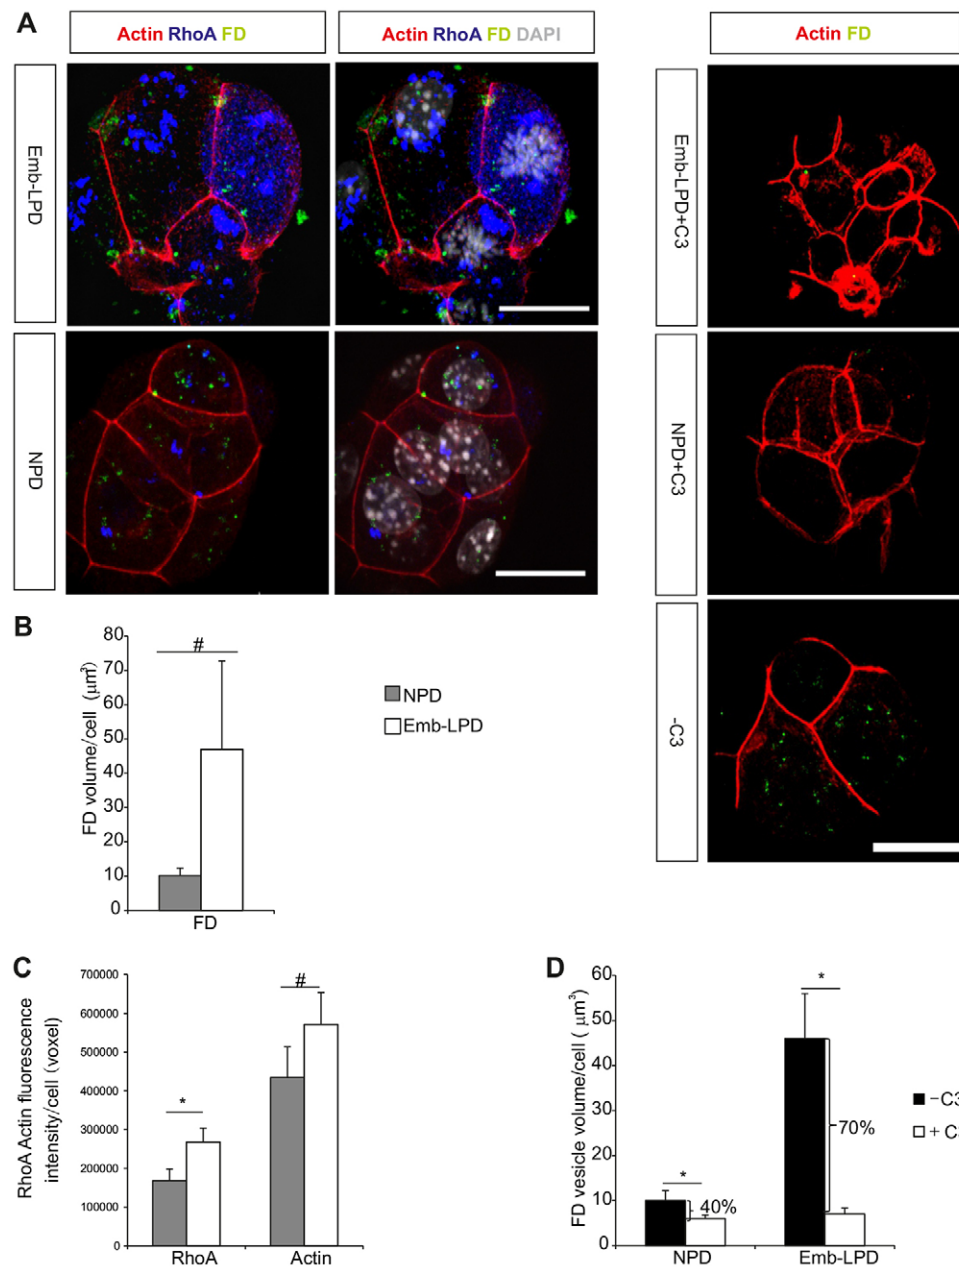

**Fig. 6. Emb-LPD blastocysts exhibit increased FITC-dextran endocytosis coinciding with increased RhoA and actin immunolabelling; inhibition of RhoA reverses this increase.** (A) Left: Emb-LPD and NPD blastocysts co-labelled for FITC-dextran (FD, green), RhoA (blue), actin (red) and nuclei (DAPI, white). RhoA localises as a ring of punctate staining at the apical surface of TE cells, whereas actin is found mainly at cell borders. Right column: FD staining is diminished by culture in C3 transferase inhibitor of RhoA. (B) FITC-dextran collective volume per TE cell is increased to trend level in Emb-LPD blastocysts. (C) RhoA and actin staining is increased (actin to trend level) in Emb-LPD blastocysts. \* $P < 0.05$ ; # $P < 0.1$ ;  $n = 5-7$  mothers and 18-21 blastocysts per treatment. (D) Endocytosed FITC-dextran collective volume per TE cell is diminished by C3 transferase to equivalent levels in Emb-LPD and NPD TE cells \* $P < 0.05$ ;  $n = 7-8$  mothers and 40-48 blastocysts per treatment. Scale bars: 20  $\mu\text{m}$ .

tract in response to Emb-LPD, but we have found BCAAs to be depleted by ~30% concentration in Emb-LPD uterine fluid (Eckert et al., 2012). Reduced BCAAs was also sufficient to activate enhanced endocytosis in blastocyst TE.

Our data therefore show continuity from maternal Emb-LPD reducing both serum and uterine fluid BCAAs exactly at the time of blastocyst formation, which in turn coincides with reduced mTORC1 signalling (Eckert et al., 2012) and stimulated endocytosis. Surprisingly, as reduced mTORC1 is commonly associated with enhanced autophagy to supplement nutrient supply for growth (Martina et al., 2012; Jewell et al., 2013), in contrast to our endocytosis data, we found no evidence of increased autophagy within Emb-LPD TE cells based on our LC3 labelling of autophagosomes. Does the reduced availability of BCAAs leading to reduced mTORC1 activation *directly* stimulate endocytosis in our model? As reduced mTORC1 activity in other systems has been shown to suppress different steps in early endocytic processing and

dynamics and nutrient uptake (Edinger and Thompson, 2002; Galvez et al., 2007; Tenay et al., 2013), this would seem unlikely, although the relationship between mTORC1 activity and endocytosis rate and processing is remarkably underexplored. Rather, we expect the link between mTORC1 signalling of reduced nutrient levels via BCAA availability in the Emb-LPD condition to enhanced endocytosis to be mediated *indirectly* through the associated and interacting mTORC2 complex. Unlike mTORC1, mTORC2 is insensitive to rapamycin and functions primarily in cytoskeletal reorganisation and cell survival mechanisms in response to external stimuli (Pópulo et al., 2012). Moreover, mTORC2 modulates cytoskeletal organisation via *Pkca* (Prkca – Mouse Genome Informatics), *Akt* (Akt1 – Mouse Genome Informatics) and the activation state of RhoA GTPase (Liu et al., 2010). Lastly, whereas mTORC1 signalling was clearly reduced via the S6 downstream effector in Emb-LPD blastocysts, the increased motility and invasiveness phenotype subsequently occurring in Emb-LPD



trophoblast outgrowths was rapamycin-insensitive, therefore likely to be mediated through mTORC2 cytoskeletal reorganisation to support implantation potential (Eckert et al., 2012).

In summary, our data indicate that maternal Emb-LPD acts to stimulate endocytosis within TE and PE lineages as a compensatory mechanism to protect nutrient provision and enhance survival. We find that this mechanism once activated becomes stable and is induced through reduced nutrients, specifically BCAAs, and mediated through RhoA activation of actin cytoskeletal organisation. In combination with our early work, we propose that this early response to adverse nutrition is mediated through both mTORC1 and mTORC2 complexes. Lastly, we show the feasibility of an ESC derived model for developmental programming of cellular and physiological criteria, providing an opportunity to reduce animal use and evaluate underlying mechanisms.

## MATERIALS AND METHODS

### Animals, diet treatment and embryo collection

MF1 mice, under UK Home Office license and local ethics approval, were bred in-house (University of Southampton Biomedical Research Facility) on a 07:00-19:00 light cycle with standard chow. Virgin females (7-8.5 weeks) were mated naturally overnight with MF1 males and plug positive females were housed individually the following morning and assigned randomly to either normal protein diet (18% casein, NPD) or isocaloric low protein diet (9% casein, Emb-LPD) until E3.5. Diet composition has been described previously (Kwong et al., 2000; Watkins et al., 2008). Alternatively, chow-fed females were used for *in vitro* culture experiments. Embryos were collected at different time points during preimplantation development after cervical dislocation. Following dissection of the reproductive tract, two-cell embryos (E1.5) and blastocysts (E3.5) were flushed from the oviducts and uterus, respectively, with H6 medium with 4 mg/ml BSA (H6+BSA) (Watkins et al., 2007).

### ESC culture and EB formation

Mouse ESC lines were prepared using standard procedures from blastocysts derived from mothers fed NPD or Emb-LPD. This comprised culture of hatched blastocysts in ES culture medium containing knockout-Dulbecco's modified Eagle medium [high glucose] (DMEM [high glucose], Gibco) supplemented with 20% knock out serum replacement (Gibco), 1 mM sodium pyruvate (Gibco), non-essential amino acids (Gibco), 0.1 mM 2-mercaptoethanol (Sigma), 2 mM glutamine, penicillin [50 U/ml]/streptomycin [50 µg/ml] (Gibco) and 1000 U/ml Lif on 0.1% gelatin-coated dish with feeder layer cells at 37°C in humidified air with 5% CO<sub>2</sub>. Mouse embryonic fibroblasts treated with 10 µg/ml mitomycin C (Sigma) were used as feeder layer. After substantial outgrowth of the ICM (2.5 days) ICM-derived cell clumps were dislodged using a finely drawn capillary tube and mechanically dissociated into single-cell and small-cell aggregates in 0.05% trypsin-ethylenediaminetetraacetic acid (EDTA) (Gibco) by thorough pipetting. The disaggregated cells were seeded onto fresh feeder layers on 96-well plates (Corning) and cultured in ES medium at 37°C in 5% CO<sub>2</sub>. ESC colonies were evident after 2-3 days (medium changed daily) and were primarily passaged at day 3.5. ESC colonies were expanded by trypsin passaging at 3-day intervals to reach confluency on a 100 mm dish. ESC clones were frozen at the earliest possible opportunity, generally after 24 days in culture (passage number 5-7).

For EB formation, ESCs were dissociated with 0.05% trypsin-EDTA and suspended in ESC culture medium without Lif supplementation for 1 hour on gelatin-treated dishes. A cell suspension (4000 in 200 µl) was subsequently pipetted into low-adherence 96-well plates and statically incubated at 37°C in humidified air with 5% CO<sub>2</sub> for 5.5 days to form EBs.

### *In vitro* embryo culture

Embryos at the two-cell stage were cultured in defined KSOM medium (Sigma) under mineral oil at 37°C in 5% CO<sub>2</sub> until the blastocyst stage either with variable protein or BCAA concentration. Protein levels were 1, 2 or 4 mg/ml BSA (Sigma) or switches between these concentrations. For

AA experiments, control medium consisted of KSOM supplemented with insulin (1 ng/ml) and the uterine luminal fluid AA concentration [including the BCAAs valine (0.46 mM), isoleucine (0.21 mM) and leucine (0.32 mM)] found in mice fed NPD at E3.5 (Eckert et al., 2012). In treatment groups BCAA concentration was either decreased (50%, LAA) or omitted (0%, 0AA) compared with control (100%, NAA). After culture, embryos were incubated for 1 hour in the same medium but containing 5 mg/ml FITC-dextran (40 kD; Sigma) to label fluid phase endocytosis.

### Endocytosis assays

Blastocysts (E3.5) from NPD or Emb-LPD fed mothers were collected in H6+BSA and immediately cultured for analysis of endocytosis in KSOM medium comprising either BSA-BODIPY (0.5 mg/ml; Invitrogen) and Lyso-Tracker (100 nM; Invitrogen) for 1 hour or FITC-dextran as above plus 0.5 mg/ml BSA for 1 hour. Lyso-Tracker and FITC-dextran were combined in some experiments using KSOM plus 0.5 mg/ml BSA. The FITC-dextran assay was also conducted after culture of blastocysts in KSOM plus 0.5 mg/ml BSA and 8 µg/ml C3 transferase (Cytoskeleton, CT04) for 2 hours to inhibit Rho-GTPases. Endocytosis was also assayed on uniform-sized EBs after differentiation from ESCs but using ESC culture medium without Lif.

### Immunocytochemistry, microscopy and antibodies

Antibodies used for immunolabelling were: mouse monoclonal to megalin (Protein G purified, 1:500) (Meads and Wild, 1993), rabbit polyclonals to E-cadherin (generated in house to mouse E-cadherin GST fusion protein; 1:250), clathrin (Cell Signaling P1663, 1:400), LC3 autophagosome marker (Cell Signaling D11 X, 1:200), RhoA (Santa Cruz sc-418, 1:100), Gata6 (R&D Systems AF1700, 1:50) and Dab2 (BD 610465, 1:1000).

Blastocysts from NPD and Emb-LPD mothers, either after or without endocytosis assay, were treated with acid Tyrode's medium (Sigma) for 15-30 seconds to remove the zona pellucida, washed in H6+BSA and fixed in 4% paraformaldehyde in PBS for 20 minutes. For megalin, RhoA and E-cadherin immunolabelling, blastocysts were permeabilised with 0.25% Triton X-100 (Sigma) in PBS for 15 minutes, washed in PBS and neutralised with 2.5 mg/ml NH<sub>4</sub>Cl in PBS for 10 minutes before primary antibody incubation in PBS containing 0.01% Tween 20 (Sigma; PBS-Tween) overnight at 4°C. For clathrin and LC3 immunolabelling, blastocysts were blocked and permeabilised with 5% fetal bovine serum (Sigma) in 0.3% Triton X-100 in PBS before antibody incubation overnight in PBS containing 1% BSA and 0.3% Tween-20. Blastocysts were subsequently washed and incubated in anti-mouse Alexa-546 or anti-rabbit Alexa-488 (Invitrogen, 1:300) in PBS-Tween for 1 hour at room temperature. Blastocysts were washed and stained for actin with Texas Red-X Phalloidin (Invitrogen, 1:100) and nuclei with DAPI (0.2 µg/ml) for 30 minutes in PBS-Tween as required. Embryos were mounted onto slides with Citifluor or Vector-shield (H-10) and viewed with a Leica SP5 confocal microscope. Images were acquired by accumulation of z-series of whole embryos (~70×1 µm spaced xy-sections) or of single trophectoderm cells (~60×0.1 µm continuous xy-sections without spaces) or of EB surface layer (~90×0.2 µm continuous xy-sections without spaces). E-cadherin staining was used to define the borders of TE cells in the blastocyst endocytosis assays.

EBs were fixed and processed for immunofluorescence analysis and confocal microscopy as for blastocysts. Additionally, Gata6 and Dab2 localisation in the EB outer layer was analysed in cryosections and examined using ABC staining to confirm formation of primitive endoderm-like cells as described previously (Gomes et al., 2010).

### RNA isolation and real-time PCR

Isolation of RNA and real-time quantitative polymerase chain reaction (qRT-PCR) in embryos and EBs was performed as described previously (Lucas et al., 2011). For EBs, *Gapdh* and *Ppib* were selected from six housekeeping gene candidates with Genorm software. Primers used were: *Lrp2* (megalin), sense CAATGGAGGATGCAGCCATATCT and antisense GTGTGGAC-ACTGGCACTCAG; *Gapdh*, sense AGCTTGTCATCAACGGGAAG and

antisense TTTGATGTTAGTGGGGTCTCG; *Ppib*, sense TTCTTCAT-AACCACAGTCAAGACC and antisense ACCTTCCGTACCACATCCAT.

### Electrophoresis and western blotting

Antibodies used for western blotting were: megalin (Proteintech 19700 1-AP, 1:500), clathrin (Cell Signaling P1663, 1:500),  $\alpha$ -tubulin (Cell Signaling 2144, 1:500), Lamp1 (Santa Cruz sc-19992, 1:100), Gata6 (R&D Systems AF1700, 1:100) and Dab2 (BD 610465, 1:1000).

Blastocysts were collected from diet-treated mothers at E3.5 and washed three times in H6 containing 4 mg/ml polyvinylpyrrolidone (H6+PVP, Sigma), pooled into groups of 50 blastocysts before adding each group in minimal volume to 10  $\mu$ l radioimmunoprecipitation assay (RIPA) buffer [50 mM Tris-HCl (pH 7.5), 150 mM NaCl, 1 mM EDTA, 1 mM ethyleneglycoltetraacetic acid (EGTA), 1% NP-40, 1% sodium deoxycholate, 1 mM Na<sub>3</sub>VO<sub>4</sub>, 50 mM NaF, cOmplete EDTA-free Protease Inhibitor Cocktail (Roche), 0.5 mM PMSF]. Five  $\mu$ l 4 $\times$  sodium dodecyl sulphate (SDS) sample buffer and 2  $\mu$ l dithiothreitol (DTT) (0.5 M) were added and boiled for 5 minutes. EBs were washed in PBS, lysed in RIPA and sonicated before adding sample buffer and boiling. Samples were run on 4-15% polyacrylamide gels (Bio-Rad). Proteins were transferred to polyvinylidene difluoride membranes and blocked in 5% milk in Tris-buffered saline + Tween 20 (TBST) followed by overnight primary antibody incubation at 4°C. Blots were subsequently washed in TBST before incubation in appropriate Odyssey fluorescent secondary antibody (Invitrogen, 1:10,000 in 5% milk in TBSB) and visualised and quantified using an Odyssey imaging system. EBs were processed for immunoblotting using identical methods.

### Fluorescent signal detection and data analysis

Images from confocal microscopy were analysed with VOLOCITY-3D quantification software (PerkinElmer). Immunofluorescence and endocytosis data were analysed by multilevel random effects regression model (SPSS) to take account of potential maternal-embryo hierarchical association. Western blot data were analysed with Student's *t*-test.

### Acknowledgements

We thank staff from the University of Southampton Biomedical Research Facility for animal provision and maintenance and the Biomedical Imaging Facility for microscopy and imaging facilities. We thank Josie Collins for help in optimising the clathrin immunolabelling protocol.

### Competing interests

The authors declare no competing financial interests.

### Author contributions

C.S., M.A.V., S.M.-S., B.S. and N.S. designed and performed experiments and edited the manuscript. A.C. provided ESC clones from Emb-LPD and NPD treatments. B.S., S.M.-S. and D.A.J. provided technical support. C.S., N.S. and T.P.F. wrote the manuscript.

### Funding

This work was supported through awards from the Biotechnology and Biological Sciences Research Council [BB/I001840/1; BB/F007450/1] and the EU-FP7 EpiHealth programme to T.P.F. C.S. was in receipt of a University of Southampton postgraduate scholarship bursary. Deposited in PMC for immediate release.

### Supplementary material

Supplementary material available online at <http://dev.biologists.org/lookup/suppl/doi:10.1242/dev.103952/-DC1>

### References

- Assémat, E., Vinot, S., Gofflot, F., Linsell-Nitschke, P., Illien, F., Châtelet, F., Verroust, P., Louvet-Vallée, S., Rinninger, F. and Kozyraki, R. (2005). Expression and role of cubilin in the internalization of nutrients during the peri-implantation development of the rodent embryo. *Biol. Reprod.* **72**, 1079-1086.
- Banrezes, B., Sainte-Beuve, T., Canon, E., Schultz, R. M., Cancela, J. and Ozil, J. P. (2011). Adult body weight is programmed by a redox-regulated and energy-dependent process during the pronuclear stage in mouse. *PLoS ONE* **6**, e29388.
- Beckman, D. A., Lloyd, J. B. and Brent, R. L. (1997). Investigations into mechanisms of amino acid supply to the rat embryo using whole-embryo culture. *Int. J. Dev. Biol.* **41**, 315-318.
- Benink, H. A. and Bement, W. M. (2005). Concentric zones of active RhoA and Cdc42 around single cell wounds. *J. Cell Biol.* **168**, 429-439.
- Bloomfield, F. H., Jaquiere, A. L. and Oliver, M. H. (2013). Nutritional regulation of fetal growth. In *Maternal and Child Nutrition: The First 1,000 Days (74th Nestlé Nutrition Institute Workshop, Goa, 2012)* (ed. J. Bhatia, Z. A. Bhutta and S. C. Kalhan), pp. 79-89. S. Karger AG: Basel.
- Bohdanowicz, M. and Grinstein, S. (2013). Role of phospholipids in endocytosis, phagocytosis, and macropinocytosis. *Physiol. Rev.* **93**, 69-106.
- Burton, G. J., Watson, A. L., Hempstock, J., Skepper, J. N. and Jauniaux, E. (2002). Uterine glands provide histiotrophic nutrition for the human fetus during the first trimester of pregnancy. *J. Clin. Endocrinol. Metab.* **87**, 2954-2959.
- Calle, A., Fernández-Gonzalez, R., Ramos-Ibeas, P., Laguna-Barraza, R., Perez-Cereales, S., Bermejo-Alvarez, P., Ramirez, M. A. and Gutierrez-Adán, A. (2012). Long-term and transgenerational effects of in vitro culture on mouse embryos. *Theriogenology* **77**, 785-793.
- Cantone, I. and Fisher, A. G. (2013). Epigenetic programming and reprogramming during development. *Nat. Struct. Mol. Biol.* **20**, 282-289.
- Ceelen, M., van Weissenbruch, M. M., Vermeiden, J. P., van Leeuwen, F. E. and Delemarre-van de Waal, H. A. (2008). Cardiometabolic differences in children born after in vitro fertilization: follow-up study. *J. Clin. Endocrinol. Metab.* **93**, 1682-1688.
- Chi, X., Wang, S., Huang, Y., Stammes, M. and Chen, J. L. (2013). Roles of rho GTPases in intracellular transport and cellular transformation. *Int. J. Mol. Sci.* **14**, 7089-7108.
- Coan, P. M., Vaughan, O. R., McCarthy, J., Mactier, C., Burton, G. J., Constância, M. and Fowden, A. L. (2011). Dietary composition programmes placental phenotype in mice. *J. Physiol.* **589**, 3659-3670.
- Dumoulin, J. C., Land, J. A., Van Montfort, A. P., Nelissen, E. C., Coonen, E., Derhaag, J. G., Schreurs, I. L., Dunselman, G. A., Kester, A. D., Geraedts, J. P. et al. (2010). Effect of in vitro culture of human embryos on birthweight of newborns. *Hum. Reprod.* **25**, 605-612.
- Dunglison, G. F. and Kaye, P. L. (1995). Endocytosis in mouse blastocysts: characterization and quantification of the fluid phase component. *Mol. Reprod. Dev.* **41**, 225-231.
- Dunglison, G. F., Jane, S. D., McCaul, T. F., Chad, J. E., Fleming, T. P. and Kaye, P. L. (1995). Stimulation of endocytosis in mouse blastocysts by insulin: a quantitative morphological analysis. *J. Reprod. Fertil.* **105**, 115-123.
- Duranthon, V., Watson, A. J. and Lonergan, P. (2008). Preimplantation embryo programming: transcription, epigenetics, and culture environment. *Reproduction* **135**, 141-150.
- Ecker, D. J., Stein, P., Xu, Z., Williams, C. J., Kopf, G. S., Bilker, W. B., Abel, T. and Schultz, R. M. (2004). Long-term effects of culture of preimplantation mouse embryos on behavior. *Proc. Natl. Acad. Sci. USA* **101**, 1595-1600.
- Eckert, J. J., Porter, R., Watkins, A. J., Burt, E., Brooks, S., Leese, H. J., Humpherson, P. G., Cameron, I. T. and Fleming, T. P. (2012). Metabolic induction and early responses of mouse blastocyst developmental programming following maternal low protein diet affecting life-long health. *PLoS ONE* **7**, e52791.
- Edinger, A. L. and Thompson, C. B. (2002). Akt maintains cell size and survival by increasing mTOR-dependent nutrient uptake. *Mol. Biol. Cell* **13**, 2276-2288.
- Faulkner, S., Elia, G., Mullen, M. P., O'Boyle, P., Dunn, M. J. and Morris, D. (2012). A comparison of the bovine uterine and plasma proteome using iTRAQ proteomics. *Proteomics* **12**, 2014-2023.
- Fernández-Gonzalez, R., Moreira, P., Bilbao, A., Jiménez, A., Pérez-Crespo, M., Ramirez, M. A., Rodríguez De Fonseca, F., Pintado, B. and Gutiérrez-Adán, A. (2004). Long-term effect of in vitro culture of mouse embryos with serum on mRNA expression of imprinting genes, development, and behavior. *Proc. Natl. Acad. Sci. USA* **101**, 5880-5885.
- Fernández-Gonzalez, R., Ramirez, M. A., Bilbao, A., De Fonseca, F. R. and Gutiérrez-Adán, A. (2007). Suboptimal in vitro culture conditions: an epigenetic origin of long-term health effects. *Mol. Reprod. Dev.* **74**, 1149-1156.
- Fleming, T. P. and Pickering, S. J. (1985). Maturation and polarization of the endocytotic system in outside blastomeres during mouse preimplantation development. *J. Embryol. Exp. Morphol.* **89**, 175-208.
- Fleming, T. P., Cannon, P. M. and Pickering, S. J. (1986). The cytoskeleton, endocytosis and cell polarity in the mouse preimplantation embryo. *Dev. Biol.* **113**, 406-419.
- Fleming, T. P., Kwong, W. Y., Porter, R., Ursell, E., Fesenko, I., Wilkins, A., Miller, D. J., Watkins, A. J. and Eckert, J. J. (2004). The embryo and its future. *Biol. Reprod.* **71**, 1046-1054.
- Fleming, T. P., Velazquez, M. A., Eckert, J. J., Lucas, E. S. and Watkins, A. J. (2012). Nutrition of females during the peri-conceptual period and effects on foetal programming and health of offspring. *Anim. Reprod. Sci.* **130**, 193-197.
- Florey, O. and Overholtzer, M. (2012). Autophagy proteins in macroendocytic engulfment. *Trends Cell Biol.* **22**, 374-380.
- Foerg, C., Ziegler, U., Fernandez-Carneado, J., Giral, E. and Merkle, H. P. (2007). Differentiation restricted endocytosis of cell penetrating peptides in MDCK cells corresponds with activities of Rho-GTPases. *Pharm. Res.* **24**, 628-642.
- Galvez, T., Teruel, M. N., Heo, W. D., Jones, J. T., Kim, M. L., Liou, J., Myers, J. W. and Meyer, T. (2007). siRNA screen of the human signaling proteome identifies the PtdIns(3,4,5)P3-mTOR signaling pathway as a primary regulator of transferrin uptake. *Genome Biol.* **8**, R142.
- Gardner, D. S., Pearce, S., Dandrea, J., Walker, R., Ramsay, M. M., Stephenson, T. and Symonds, M. E. (2004). Peri-implantation undernutrition programs blunted angiotensin II evoked baroreflex responses in young adult sheep. *Hypertension* **43**, 1290-1296.
- Garred, Ø., Rodal, S. K., van Deurs, B. and Sandvig, K. (2001). Reconstitution of clathrin-independent endocytosis at the apical domain of permeabilized MDCK II cells: requirement for a Rho-family GTPase. *Traffic* **2**, 26-36.

- Gomes, I. C., Acquarone, M., Maciel, R. M., Erlich, R. B. and Rehen, S. K. (2010). Analysis of pluripotent stem cells by using cryosections of embryoid bodies. *J. Vis. Exp.* **46**, 2344.
- Gueth-Hallonet, C., Santa-Maria, A., Verroust, P. and Maro, B. (1994). Gp330 is specifically expressed in outer cells during epithelial differentiation in the preimplantation mouse embryo. *Development* **120**, 3289-3299.
- Hall, A. (2005). Rho GTPases and the control of cell behaviour. *Biochem. Soc. Trans.* **33**, 891-895.
- Jewell, L. L., Russell, R. C. and Guan, K. L. (2013). Amino acid signalling upstream of mTOR. *Nat. Rev. Mol. Cell Biol.* **14**, 133-139.
- Kakar, M. A., Maddocks, S., Lorimer, M. F., Kleemann, D. O., Rudiger, S. R., Hartwich, K. M. and Walker, S. K. (2005). The effect of peri-conception nutrition on embryo quality in the superovulated ewe. *Theriogenology* **64**, 1090-1103.
- Koike, M., Sakaki, S., Amano, Y. and Kurosawa, H. (2007). Characterization of embryoid bodies of mouse embryonic stem cells formed under various culture conditions and estimation of differentiation status of such bodies. *J. Biosci. Bioeng.* **104**, 294-299.
- Krijnen, P. A., Sipkens, J. A., Molling, J. W., Rauwerda, J. A., Stehouwer, C. D., Muller, A., Paulus, W. J., van Nieuw Amerongen, G. P., Hack, C. E., Verhoeven, A. J. et al. (2010). Inhibition of Rho-ROCK signaling induces apoptotic and non-apoptotic PS exposure in cardiomyocytes via inhibition of flippase. *J. Mol. Cell. Cardiol.* **49**, 781-790.
- Kwong, W. Y., Wild, A. E., Roberts, P., Willis, A. C. and Fleming, T. P. (2000). Maternal undernutrition during the preimplantation period of rat development causes blastocyst abnormalities and programming of postnatal hypertension. *Development* **127**, 4195-4202.
- Laguna-Barraza, R., Bermejo-Álvarez, P., Ramos-Ibeas, P., de Frutos, C., López-Cardona, A. P., Calle, A., Fernández-Gonzalez, R., Pericuesta, E., Ramirez, M. A. and Gutierrez-Adán, A. (2013). Sex-specific embryonic origin of postnatal phenotypic variability. *Reprod. Fertil. Dev.* **25**, 38-47.
- Lamb, C. A., Dooley, H. C. and Tooze, S. A. (2013). Endocytosis and autophagy: Shared machinery for degradation. *Bioessays* **35**, 34-45.
- Liu, L., Das, S., Losert, W. and Parent, C. A. (2010). mTORC2 regulates neutrophil chemotaxis in a cAMP- and RhoA-dependent fashion. *Dev. Cell* **19**, 845-857.
- Lucas, E. S., Watkins, A. J., Cox, A. L., Marfy-Smith, S. J., Smyth, N. and Fleming, T. P. (2011). Tissue-specific selection of reference genes is required for expression studies in the mouse model of maternal protein undernutrition. *Theriogenology* **76**, 558-569.
- Luzio, J. P., Parkinson, M. D., Gray, S. R. and Bright, N. A. (2009). The delivery of endocytosed cargo to lysosomes. *Biochem. Soc. Trans.* **37**, 1019-1021.
- Martina, J. A., Chen, Y., Gucek, M. and Puertollano, R. (2012). mTORC1 functions as a transcriptional regulator of autophagy by preventing nuclear transport of TFEB. *Autophagy* **8**, 903-914.
- Marzolo, M. P. and Farfán, P. (2011). New insights into the roles of megalin/LRP2 and the regulation of its functional expression. *Biol. Res.* **44**, 89-105.
- Meads, T. J. and Wild, A. E. (1993). Apical expression of an antigen common to rabbit yolk sac endoderm and kidney proximal tubule epithelium. *J. Reprod. Immunol.* **23**, 247-264.
- Mitchell, M., Schulz, S. L., Armstrong, D. T. and Lane, M. (2009). Metabolic and mitochondrial dysfunction in early mouse embryos following maternal dietary protein intervention. *Biol. Reprod.* **80**, 622-630.
- Moestrup, S. K. and Verroust, P. J. (2001). Megalin- and cubilin-mediated endocytosis of protein-bound vitamins, lipids, and hormones in polarized epithelia. *Annu. Rev. Nutr.* **21**, 407-428.
- Morgan, H. D., Jin, X. L., Li, A., Whitelaw, E. and O'Neill, C. (2008). The culture of zygotes to the blastocyst stage changes the postnatal expression of an epigenetically labile allele, agouti viable yellow, in mice. *Biol. Reprod.* **79**, 618-623.
- Nelson, W. J. (2009). Remodeling epithelial cell organization: transitions between front-rear and apical-basal polarity. *Cold Spring Harb. Perspect. Biol.* **1**, a000513.
- Pópulo, H., Lopes, J. M. and Soares, P. (2012). The mTOR signalling pathway in human cancer. *Int. J. Mol. Sci.* **13**, 1886-1918.
- Rossant, J. and Tam, P. P. (2009). Blastocyst lineage formation, early embryonic asymmetries and axis patterning in the mouse. *Development* **136**, 701-713.
- Sandvig, K., Torgersen, M. L., Raa, H. A. and van Deurs, B. (2008). Clathrin-independent endocytosis: from nonexistent to an extreme degree of complexity. *Histochem. Cell Biol.* **129**, 267-276.
- Sinclair, K. D., Allegrucci, C., Singh, R., Gardner, D. S., Sebastian, S., Bispham, J., Thurston, A., Huntley, J. F., Rees, W. D., Maloney, C. A. et al. (2007). DNA methylation, insulin resistance, and blood pressure in offspring determined by maternal periconceptional B vitamin and methionine status. *Proc. Natl. Acad. Sci. USA* **104**, 19351-19356.
- Tenay, B., Kimberlin, E., Williams, M., Denise, J., Fakilahyel, J. and Kim, K. (2013). Inactivation of Tor proteins affects the dynamics of endocytic proteins in early stage of endocytosis. *J. Biosci.* **38**, 351-361.
- Torrens, C., Snelling, T. H., Chau, R., Shanmuganathan, M., Cleal, J. K., Poore, K. R., Noakes, D. E., Poston, L., Hanson, M. A. and Green, L. R. (2009). Effects of pre- and periconceptional undernutrition on arterial function in adult female sheep are vascular bed dependent. *Exp. Physiol.* **94**, 1024-1033.
- Velazquez, M. A., Parrilla, I., Van Soom, A., Verberckmoes, S., Kues, W. and Niemann, H. (2010). Sampling techniques for oviductal and uterine luminal fluid in cattle. *Theriogenology* **73**, 758-767.
- Wang, X. and Proud, C. G. (2009). Nutrient control of TORC1, a cell-cycle regulator. *Trends Cell Biol.* **19**, 260-267.
- Watkins, A. J., Platt, D., Papenbrock, T., Wilkins, A., Eckert, J. J., Kwong, W. Y., Osmond, C., Hanson, M. and Fleming, T. P. (2007). Mouse embryo culture induces changes in postnatal phenotype including raised systolic blood pressure. *Proc. Natl. Acad. Sci. USA* **104**, 5449-5454.
- Watkins, A. J., Ursell, E., Panton, R., Papenbrock, T., Hollis, L., Cunningham, C., Wilkins, A., Perry, V. H., Sheth, B., Kwong, W. Y. et al. (2008). Adaptive responses by mouse early embryos to maternal diet protect fetal growth but predispose to adult onset disease. *Biol. Reprod.* **78**, 299-306.
- Watkins, A. J., Lucas, E. S., Torrens, C., Cleal, J. K., Green, L., Osmond, C., Eckert, J. J., Gray, W. P., Hanson, M. A. and Fleming, T. P. (2010). Maternal low-protein diet during mouse pre-implantation development induces vascular dysfunction and altered renin-angiotensin-system homeostasis in the offspring. *Br. J. Nutr.* **103**, 1762-1770.
- Watkins, A. J., Lucas, E. S., Wilkins, A., Cagampang, F. R. and Fleming, T. P. (2011). Maternal periconceptional and gestational low protein diet affects mouse offspring growth, cardiovascular and adipose phenotype at 1 year of age. *PLoS ONE* **6**, e28745.
- Young, L. E., Fernandes, K., McEvoy, T. G., Butterwith, S. C., Gutierrez, C. G., Carolan, C., Broadbent, P. J., Robinson, J. J., Wilmut, I. and Sinclair, K. D. (2001). Epigenetic change in IGF2R is associated with fetal overgrowth after sheep embryo culture. *Nat. Genet.* **27**, 153-154.
- Zohn, I. E. and Sarkar, A. A. (2010). The visceral yolk sac endoderm provides for absorption of nutrients to the embryo during neurulation. *Birth Defects Res. A Clin. Mol. Teratol.* **88**, 593-600.
